# Supplementary material
Source: PubMed Central journal article supplement (PMC4939710)

## Supplementary Online Content

Bresnahan M, Hornig M, Schultz AF, et al. Association of maternal report of infant and toddler gastrointestinal symptoms with autism: evidence from a prospective birth cohort. *JAMA Psychiatry*. Published online March 25, 2015.

doi:10.1001/jamapsychiatry.2014.3034.

**eTable 1.** Selected Population-Based Studies, 2008-2013

**eTable 2.** Gastrointestinal Symptoms in Children With Developmental Delay vs Children With Typical Development

**eTable 3.** Longitudinal Gastrointestinal Symptoms in Children With Developmental Delay vs Children With Typical Development

**eTable 4.** Gastrointestinal Symptoms in Children With Autism Spectrum Disorder vs Children With Developmental Motor Delay, Language Delay, and Motor and Language Delay

**eTable 5.** Longitudinal Gastrointestinal Symptoms in Children With Autism Spectrum Disorder vs Children With Developmental Motor Delay, Language Delay, and Motor and Language Delay

**eTable 6.** Gastrointestinal Symptoms in Children With Autistic Disorder, Asperger Syndrome, and PDD-NOS vs Children With Typical Development

**eTable 7.** Longitudinal Gastrointestinal Symptoms in Children With Autistic Disorder, Asperger Syndrome, and PDD-NOS vs Children With Typical Development

**eTable 8.** Gastrointestinal Symptoms in Children With Autistic Disorder, Asperger Syndrome, and PDD-NOS vs Children With Delayed Development

**eTable 9.** Longitudinal Gastrointestinal Symptoms in Children With Autistic Disorder, Asperger Syndrome, and PDD-NOS vs Children With Developmental Delay

**eFigure 1.** Gastrointestinal Symptoms at 18 Months (A) and 36 Months (B) in Children With Autism Spectrum Disorders (by Subtype) vs Children With Typical Development

**eFigure 2.** Gastrointestinal Symptoms at 18 Months (A) and 36 Months (B) in Children With Autism Spectrum Disorders (by Subtype) vs Children With Developmental Delay

This supplementary material has been provided by the authors to give readers additional information about their work.

**eTable 1.** Selected Population-Based Studies, 2008-2013

| Study                         | Design       | N                                 | Age (years) | ASD diagnosis   | Source of GI data | Associations                   | X1 | X2 |
|-------------------------------|--------------|-----------------------------------|-------------|-----------------|-------------------|--------------------------------|----|----|
| Ibrahim (2009) <sup>2</sup>   | Case/Control | ASD=121; Control=242              | <21         | ASD: DSM-IV     | Medical records   | Any GI (lifetime) <sup>a</sup> | ns | -- |
|                               |              |                                   |             |                 |                   | DH (lifetime)                  | ns | -- |
|                               |              |                                   |             |                 |                   | CO (lifetime)                  | +  | -- |
|                               |              |                                   |             |                 |                   | FI/FS (lifetime)               | +  | -- |
| Sandhu (2009) <sup>3</sup>    | Cohort       | Cohort=12,984; ASD=78             | Birth-3.5   | ASD: ICD-10     | Maternal report   | DH (6-18 months)               | ns | -- |
|                               |              |                                   |             |                 |                   | DH (18-30 months)              | ns | -- |
|                               |              |                                   |             |                 |                   | DH (30-42 months)              | +  | -- |
| Mouridsen (2010) <sup>4</sup> | Case/Control | IA=118; Control=336               | 2-57        | IA: ICD-8,-10   | Medical records   | Any GI <sup>b</sup>            | ns | -- |
| Chandler (2013) <sup>5</sup>  | Case/Control | ASD=132; TD (X1)=82; SN (X2)=81   | 10-14       | ASD: ICD-10     | Maternal report   | Any GI (lifetime) <sup>c</sup> | +  | +  |
|                               |              |                                   |             |                 |                   | DH (past)                      | +  | +  |
|                               |              |                                   |             |                 |                   | DH (current)                   | ns | ns |
|                               |              |                                   |             |                 |                   | CO (past)                      | -- | -- |
|                               |              |                                   |             |                 |                   | CO (current)                   | ns | +  |
| Chaidez (2014) <sup>6</sup>   | Case/Control | ASD=499; TD (X1)=324; DD (X2)=137 | 2-5         | ASD: ADI-R/ADOS | Maternal report   | Any GI (current) <sup>d</sup>  | +  | +  |
|                               |              |                                   |             |                 |                   | DH (current)                   | +  | ns |
|                               |              |                                   |             |                 |                   | CO (current)                   | +  | +  |
|                               |              |                                   |             |                 |                   | SF (current)                   |    |    |

Key: **ADI-R**, Autism Diagnostic Interview – Revised; **ADOS**, Autism Diagnostic Observation Schedule; **ASD**, autism spectrum disorder; **CO**, constipation; **DD**, developmentally delayed; **DH**, diarrhea; **DSM-IV**, Diagnostic and Statistical Manual-IV; **FI/FS**, feeding issues/food selectivity; **GI**, gastrointestinal; **IA**, Infantile Autism; **ICD**, International Classification of Diseases – 8<sup>th</sup>, 10<sup>th</sup> edition; **SF**, sensitivity to foods; **SN**, special needs; **TD**, typically developing children; **X1**, comparison with control group 1; **X2**, comparison with control group 2; **ns**, not significant; +, significant association; --, not reported/not studied.

- <sup>a</sup> any DH, CO, abdominal discomfort/irritability, vomiting/reflux, feeding issues/food selectivity
- <sup>b</sup> any GI disorders (ICD-8 520.09-577.99, ICD-10 K00-K93.8), GI symptoms (ICD-8 784.09-785.89, ICD-10 R10-R19)
- <sup>c</sup> any current or past DH, current or past abdominal pain, current or past persistent vomiting, current CO, past stool withholding, past mouth ulcers, current soiling, current blood in stools, current mucus in stools
- <sup>d</sup> any abdominal pain, gas/bloating, DH, CO, pain on stooling, vomiting, sensitivity to foods, difficulty swallowing, blood in stools, blood in vomit

**eTable 2.** Gastrointestinal Symptoms in Children With Developmental Delay vs Children With Typical Development

|                              | Developmental Delay vs. Typical Development |               |
|------------------------------|---------------------------------------------|---------------|
|                              | OR (95% CI)                                 | aOR (95% CI)  |
| 6-18 Months                  |                                             |               |
| Diarrhea                     | 1.0 (1.0–1.1)                               | 1.0 (0.9–1.1) |
| Constipation                 | 1.2 (1.1–1.4)                               | 1.3 (1.2–1.5) |
| Food Allergy/<br>Intolerance | 1.2 (1.1–1.4)                               | 1.1 (1.0–1.3) |
| Any GI<br>Symptom            | 1.1 (1.0–1.2)                               | 1.1 (1.0–1.1) |
| 18-36 Months                 |                                             |               |
| Diarrhea                     | 1.2 (1.1–1.4)                               | 1.1 (0.9–1.2) |
| Constipation                 | 1.1 (1.0–1.2)                               | 1.3 (1.2–1.4) |
| Food Allergy/<br>Intolerance | 1.3 (1.1–1.4)                               | 1.2 (1.1–1.3) |
| Any GI<br>Symptom*           | 1.2 (1.1–1.3)                               | 1.2 (1.1–1.3) |

Key: **CI**, confidence interval; **GI**, gastrointestinal; **OR**, odds ratio; **aOR**, adjusted odds ratio

\*Any GI Symptom includes: diarrhea, constipation, and food allergy/intolerance

**eTable 3.** Longitudinal Gastrointestinal Symptoms in Children With Developmental Delay vs Children With Typical Development

|                                 | Developmental Delay vs. Typical Development |               |
|---------------------------------|---------------------------------------------|---------------|
|                                 | OR (95% CI)                                 | aOR (95% CI)  |
| <b>Diarrhea</b>                 |                                             |               |
| None                            | Reference                                   | Reference     |
| 6-18 months only                | 1.0 (1.0–1.1)                               | 1.0 (0.9–1.1) |
| 18-36 months only               | 1.5 (1.2–1.9)                               | 1.3 (1.0–1.6) |
| Both                            | 1.2 (1.0–1.4)                               | 1.0 (0.8–1.2) |
| <b>Constipation</b>             |                                             |               |
| None                            | Reference                                   | Reference     |
| 6-18 months only                | 1.2 (1.1–1.4)                               | 1.3 (1.2–1.5) |
| 18-36 months only               | 1.1 (1.0–1.2)                               | 1.2 (1.1–1.4) |
| Both                            | 1.3 (1.1–1.5)                               | 1.5 (1.3–1.7) |
| <b>Food Allergy/Intolerance</b> |                                             |               |
| None                            | Reference                                   | Reference     |
| 6-18 months only                | 1.1 (1.0–1.3)                               | 1.1 (0.9–1.3) |
| 18-36 months only               | 1.3 (1.1–1.5)                               | 1.2 (1.0–1.4) |
| Both                            | 1.3 (1.1–1.5)                               | 1.2 (1.0–1.4) |
| <b>Any GI Symptom*</b>          |                                             |               |
| None                            | Reference                                   | Reference     |
| 6-18 months only                | 1.1 (1.0–1.1)                               | 1.0 (1.0–1.1) |
| 18-36 months only               | 1.2 (1.1–1.3)                               | 1.3 (1.1–1.4) |
| Both                            | 1.3 (1.1–1.4)                               | 1.2 (1.1–1.4) |

Key: **CI**, confidence interval; **GI**, gastrointestinal; **OR**, odds ratio; **aOR**, adjusted odds ratio

\*Any GI Symptom includes: diarrhea, constipation, and food allergy/intolerance

**eTable 4.** Gastrointestinal Symptoms in Children With Autism Spectrum Disorder vs Children With Developmental Motor Delay, Language Delay, and Motor and Language Delay

|                          | <b>ASD vs. MD only</b> | <b>ASD vs. LD only</b> | <b>ASD vs. MD &amp; LD</b> |
|--------------------------|------------------------|------------------------|----------------------------|
|                          | <b>OR (95% CI)</b>     | <b>OR (95% CI)</b>     | <b>OR (95% CI)</b>         |
| <b>6-18 Months</b>       |                        |                        |                            |
| Diarrhea                 | 1.0 (0.8–1.4)          | 1.2 (0.9–1.6)          | 1.3 (0.9–1.8)              |
| Constipation             | 2.0 (1.3–2.8)          | 2.0 (1.4–3.0)          | 1.0 (0.7–1.6)              |
| Food Allergy/Intolerance | 1.6 (1.0–2.5)          | 1.6 (1.0–2.5)          | 1.3 (0.8–2.2)              |
| Any GI Symptom*          | 1.2 (0.9–1.7)          | 1.4 (1.0–1.9)          | 1.1 (0.8–1.6)              |
| <b>18-36 Months</b>      |                        |                        |                            |
| Diarrhea                 | 2.4 (1.5–3.9)          | 2.1 (1.3–3.5)          | 1.5 (0.8–2.6)              |
| Constipation             | 1.3 (0.9–1.9)          | 1.4 (1.0–2.0)          | 0.6 (0.4–1.0)              |
| Food Allergy/Intolerance | 1.7 (1.1–2.6)          | 2.0 (1.2–3.1)          | 1.2 (0.7–2.1)              |
| Any GI Symptom*          | 1.8 (1.3–2.4)          | 1.9 (1.4–2.6)          | 0.9 (0.6–1.3)              |

Key: **CI**, confidence interval; **GI**, gastrointestinal; **OR**, odds ratio

\*Any GI Symptom includes: diarrhea, constipation, and food allergy/intolerance

**eTable 5.** Longitudinal Gastrointestinal Symptoms in Children With Autism Spectrum Disorder vs Children With Developmental Motor Delay, Language Delay, and Motor and Language Delay

|                                     | <b>ASD vs. MD<br/>only</b> | <b>ASD vs. LD<br/>only</b> | <b>ASD vs. MD &amp;<br/>LD</b> |
|-------------------------------------|----------------------------|----------------------------|--------------------------------|
|                                     | <b>OR (95% CI)</b>         | <b>OR (95% CI)</b>         | <b>OR (95% CI)</b>             |
| <b>Diarrhea</b>                     |                            |                            |                                |
| None                                | Reference                  | Reference                  | Reference                      |
| 6-18 months only                    | 1.1 (0.7–1.3)              | 1.1 (0.8–1.5)              | 1.2 (0.8–1.8)                  |
| 18-36 months only                   | 2.5 (1.0–6.0)              | 1.5 (0.6–3.8)              | 1.1 (0.4–3.0)                  |
| Both                                | 2.3 (1.3–4.1)              | 2.7 (1.5–4.9)              | 2.0 (1.0–4.0)                  |
| <b>Constipation</b>                 |                            |                            |                                |
| None                                | Reference                  | Reference                  | Reference                      |
| 6-18 months only                    | 1.6 (1.0–2.7)              | 1.7 (1.0–2.9)              | 1.2 (0.7–2.3)                  |
| 18-36 months only                   | 1.0 (0.6–1.6)              | 1.1 (0.7–1.8)              | 0.6 (0.3–1.0)                  |
| Both                                | 2.4 (1.5–4.1)              | 2.5 (1.5–4.3)              | 0.8 (0.4–1.4)                  |
| <b>Food<br/>Allergy/Intolerance</b> |                            |                            |                                |
| None                                | Reference                  | Reference                  | Reference                      |
| 6-18 months only                    | 1.7 (0.9–3.3)              | 1.6 (0.8–3.2)              | 1.6 (0.7–3.6)                  |
| 18-36 months only                   | 1.9 (1.0–3.6)              | 2.6 (1.3–5.1)              | 1.4 (0.7–3.1)                  |
| Both                                | 1.6 (0.9–2.9)              | 1.6 (0.9–3.0)              | 1.2 (0.6–2.3)                  |
| <b>Any GI Symptom*</b>              |                            |                            |                                |
| None                                | Reference                  | Reference                  | Reference                      |
| 6-18 months only                    | 1.0 (0.7–1.5)              | 1.1 (0.8–1.6)              | 1.1 (0.7–1.6)                  |
| 18-36 months only                   | 1.4 (0.8–2.4)              | 1.4 (0.8–2.5)              | 0.7 (0.4–1.3)                  |
| Both                                | 2.0 (1.3–2.9)              | 2.4 (1.6–3.6)              | 1.0 (0.7–1.6)                  |

Key: **CI**, confidence interval; **GI**, gastrointestinal; **OR**, odds ratio

\*Any GI Symptom includes: diarrhea, constipation, and food allergy/intolerance

**eTable 6.** Gastrointestinal Symptoms in Children With Autistic Disorder, Asperger Syndrome, and PDD-NOS vs Children With Typical Development

|                          | <b>AD vs. TD</b>   | <b>AS vs. TD</b>   | <b>PDD-NOS vs. TD</b> |
|--------------------------|--------------------|--------------------|-----------------------|
|                          | <b>OR (95% CI)</b> | <b>OR (95% CI)</b> | <b>OR (95% CI)</b>    |
| <b>6-18 Months</b>       |                    |                    |                       |
| Diarrhea                 | 1.4 (0.9–2.1)      | 0.8 (0.4–1.5)      | 1.1 (0.7–1.8)         |
| Constipation             | 2.4 (1.4–4.1)      | 0.7 (0.2–2.3)      | 3.3 (2.0–5.6)         |
| Food Allergy/Intolerance | 1.7 (0.8–3.3)      | 2.7 (1.2–6.1)      | 1.7 (0.8–3.6)         |
| Any GI Symptom*          | 1.6 (1.0–2.5)      | 0.9 (0.5–1.7)      | 1.6 (1.0–2.6)         |
| <b>18-36 Months</b>      |                    |                    |                       |
| Diarrhea                 | 2.3 (1.1–4.8)      | 4.3 (1.9–9.6)      | 2.3 (1.1–5.1)         |
| Constipation             | 1.5 (0.9–2.6)      | 1.7 (0.8–3.5)      | 1.1 (0.6–2.1)         |
| Food Allergy/Intolerance | 2.3 (1.2–4.3)      | 2.5 (1.0–5.9)      | 1.9 (0.9–3.9)         |
| Any GI Symptom*          | 2.0 (1.3–3.1)      | 2.7 (1.5–5.0)      | 1.7 (1.0–2.8)         |

Key: **CI**, confidence interval; **GI**, gastrointestinal; **OR**, odds ratio

\*Any GI Symptom includes: diarrhea, constipation, and food allergy/intolerance



**eTable 7.** Longitudinal Gastrointestinal Symptoms in Children With Autistic Disorder, Asperger Syndrome, and PDD-NOS vs Children With Typical Development

|                                 | <b>AD vs. TD</b>   | <b>AS vs. TD</b>   | <b>PDD-NOS vs. TD</b> |
|---------------------------------|--------------------|--------------------|-----------------------|
|                                 | <b>OR (95% CI)</b> | <b>OR (95% CI)</b> | <b>OR (95% CI)</b>    |
| <b>Diarrhea</b>                 |                    |                    |                       |
| None                            | Reference          | Reference          | Reference             |
| 6–18 months only                | 1.3 (0.8–2.1)      | 0.6 (0.3–1.3)      | 1.1 (0.7–1.8)         |
| 18–36 months only               | 2.4 (0.6–10.0)     | 3.8 (0.9–16.0)     | 2.5 (0.6–10.6)        |
| Both                            | 2.7 (1.1–6.4)      | 3.5 (1.3–9.2)      | 2.4 (0.9–6.1)         |
| <b>Constipation</b>             |                    |                    |                       |
| None                            | Reference          | Reference          | Reference             |
| 6–18 months only                | 1.9 (0.9–4.1)      | 0.4 (0.1–3.2)      | 3.1 (1.6–6.0)         |
| 18–36 months only               | 1.1 (0.6–2.3)      | 1.8 (0.8–3.9)      | 0.6 (0.2–1.6)         |
| Both                            | 3.1 (1.5–6.3)      | 1.2 (0.3–5.2)      | 3.2 (1.5–6.8)         |
| <b>Food Allergy/Intolerance</b> |                    |                    |                       |
| None                            | Reference          | Reference          | Reference             |
| 6–18 months only                | 2.1 (0.9–5.3)      | 2.5 (0.8–8.3)      | 1.4 (0.4–4.5)         |
| 18–36 months only               | 3.6 (1.7–7.9)      | 2.1 (0.5–8.7)      | 1.7 (0.5–5.5)         |
| Both                            | 1.5 (0.5–4.1)      | 3.0 (1.1–8.4)      | 2.0 (0.8–5.1)         |
| <b>Any GI Symptom*</b>          |                    |                    |                       |
| None                            | Reference          | Reference          | Reference             |
| 6–18 months only                | 1.2 (0.7–2.1)      | 0.7 (0.3–1.6)      | 1.3 (0.8–2.4)         |
| 18–36 months only               | 1.3 (0.5–3.1)      | 2.6 (1.0–6.3)      | 1.2 (0.5–3.2)         |
| Both                            | 2.7 (1.5–4.7)      | 2.2 (1.0–4.8)      | 2.3 (1.3–4.3)         |

Key: **CI**, confidence interval; **GI**, gastrointestinal; **OR** odds ratio

\*Any GI Symptom includes: diarrhea, constipation, and food allergy/intolerance

**eTable 8.** Gastrointestinal Symptoms in Children With Autistic Disorder, Asperger Syndrome, and PDD-NOS vs Children With Delayed Development

|                          | <b>AD vs. DD</b>   | <b>AS vs. DD</b>   | <b>PDD-NOS vs. DD</b> |
|--------------------------|--------------------|--------------------|-----------------------|
|                          | <b>OR (95% CI)</b> | <b>OR (95% CI)</b> | <b>OR (95% CI)</b>    |
| <b>6-18 Months</b>       |                    |                    |                       |
| Diarrhea                 | 1.3 (0.9–2.0)      | 0.8 (0.4–1.4)      | 1.1 (0.7–1.8)         |
| Constipation             | 1.9 (1.1–3.3)      | 0.6 (0.2–1.8)      | 2.7 (1.6–4.6)         |
| Food Allergy/Intolerance | 1.4 (0.7–2.8)      | 2.2 (1.0–5.0)      | 1.4 (0.7–3.0)         |
| Any GI Symptom*          | 1.5 (0.9–2.3)      | 0.8 (0.5–1.5)      | 1.5 (0.9–2.4)         |
| <b>18-36 Months</b>      |                    |                    |                       |
| Diarrhea                 | 1.9 (0.9–3.9)      | 3.5 (1.5–7.9)      | 1.9 (0.9–4.2)         |
| Constipation             | 1.4 (0.8–2.3)      | 1.5 (0.7–3.1)      | 1.0 (0.5–1.8)         |
| Food Allergy/Intolerance | 1.8 (1.0–3.5)      | 2.0 (0.8–4.7)      | 1.5 (0.7–3.1)         |
| Any GI Symptom*          | 1.7 (1.1–2.6)      | 2.3 (1.2–4.2)      | 1.4 (0.9–2.3)         |

Key: **CI**, confidence interval; **GI**, gastrointestinal; **OR**, odds ratio

\*Any GI Symptom includes: diarrhea, constipation, and food allergy/intolerance

**eTable 9.** Longitudinal Gastrointestinal Symptoms in Children With Autistic Disorder, Asperger Syndrome, and PDD-NOS vs Children With Developmental Delay

|                                 | <b>AD vs. DD</b>   | <b>AS vs. DD</b>   | <b>PDD-NOS vs. DD</b> |
|---------------------------------|--------------------|--------------------|-----------------------|
|                                 | <b>OR (95% CI)</b> | <b>OR (95% CI)</b> | <b>OR (95% CI)</b>    |
| <b>Diarrhea</b>                 |                    |                    |                       |
| None                            | Reference          | Reference          | Reference             |
| 6-18 months only                | 1.3 (0.8–2.0)      | 0.6 (0.3–1.3)      | 1.1 (0.6–1.7)         |
| 18-36 months only               | 1.6 (0.4–6.9)      | 2.6 (0.6–11.0)     | 1.7 (0.4–7.3)         |
| Both                            | 2.3 (1.0–5.6)      | 3.0 (1.1–8.0)      | 2.0 (0.8–5.3)         |
| <b>Constipation</b>             |                    |                    |                       |
| None                            | Reference          | Reference          | Reference             |
| 6-18 months only                | 1.6 (0.7–3.3)      | 0.4 (0.0–2.6)      | 2.5 (1.3–4.9)         |
| 18-36 months only               | 1.0 (0.5–2.1)      | 1.6 (0.7–3.5)      | 0.5 (0.2–1.5)         |
| Both                            | 2.4 (1.2–5.0)      | 1.0 (0.2–4.1)      | 2.5 (1.2–5.4)         |
| <b>Food Allergy/Intolerance</b> |                    |                    |                       |
| None                            | Reference          | Reference          | Reference             |
| 6-18 months only                | 1.9 (0.7–4.7)      | 2.2 (0.7–7.3)      | 1.2 (0.4–3.9)         |
| 18-36 months only               | 2.9 (1.3–6.4)      | 1.6 (0.4–6.9)      | 1.4 (0.4–4.4)         |
| Both                            | 1.2 (0.4–3.2)      | 2.3 (0.8–6.6)      | 1.6 (0.6–4.0)         |
| <b>Any GI Symptom*</b>          |                    |                    |                       |
| None                            | Reference          | Reference          | Reference             |
| 6-18 months only                | 1.1 (0.7–2.0)      | 0.7 (0.3–1.5)      | 1.3 (0.7–2.2)         |
| 18-36 months only               | 1.1 (0.4–2.7)      | 2.2 (0.9–5.4)      | 1.0 (0.4–2.7)         |
| Both                            | 2.2 (1.2–3.8)      | 1.8 (0.8–3.8)      | 1.9 (0.7–3.5)         |

Key: **CI**, confidence interval; **GI**, gastrointestinal; **OR**, odds ratio

\*Any GI Symptom includes: diarrhea, constipation, and food allergy/intolerance

**eFigure 1.** Gastrointestinal Symptoms at 18 Months (A) and 36 Months (B) in Children With Autism Spectrum Disorders (by Subtype) vs Children With Typical Development

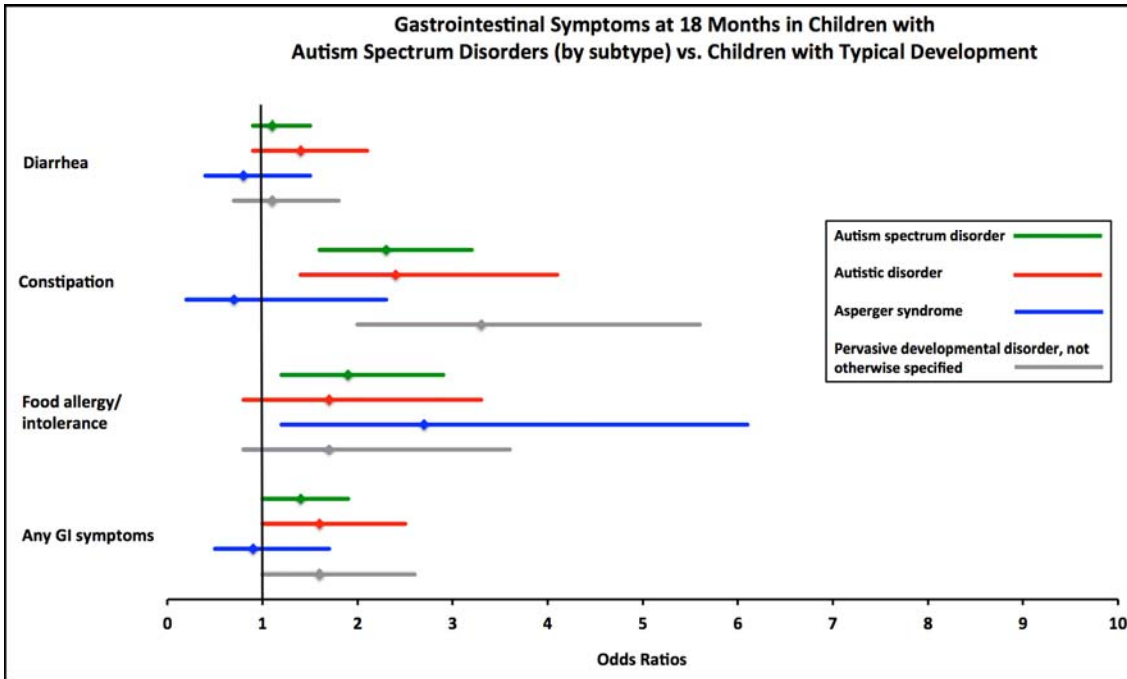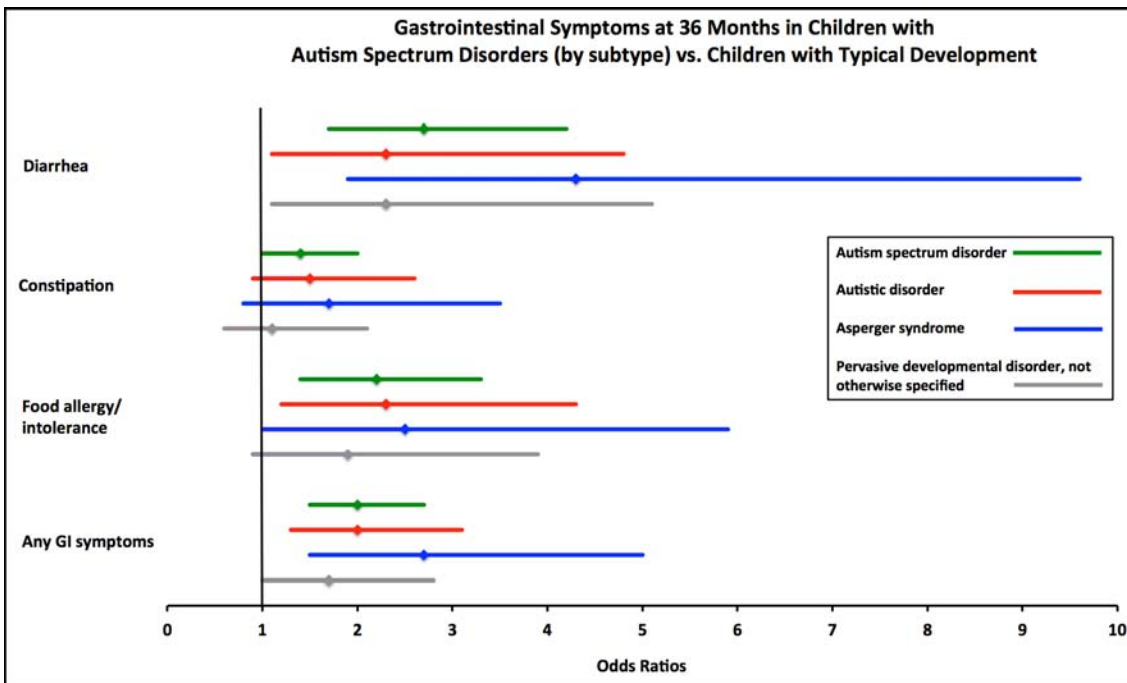

**eFigure 2.** Gastrointestinal Symptoms at 18 Months (A) and 36 Months (B) in Children With Autism Spectrum Disorders (by Subtype) vs Children With Developmental Delay

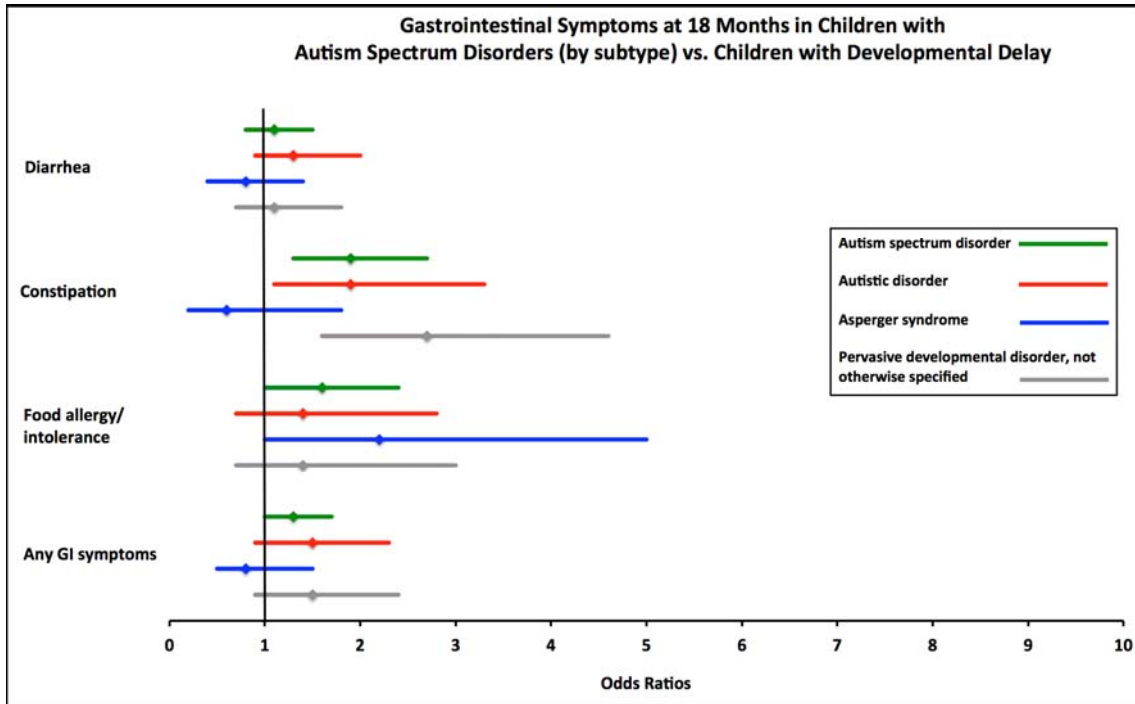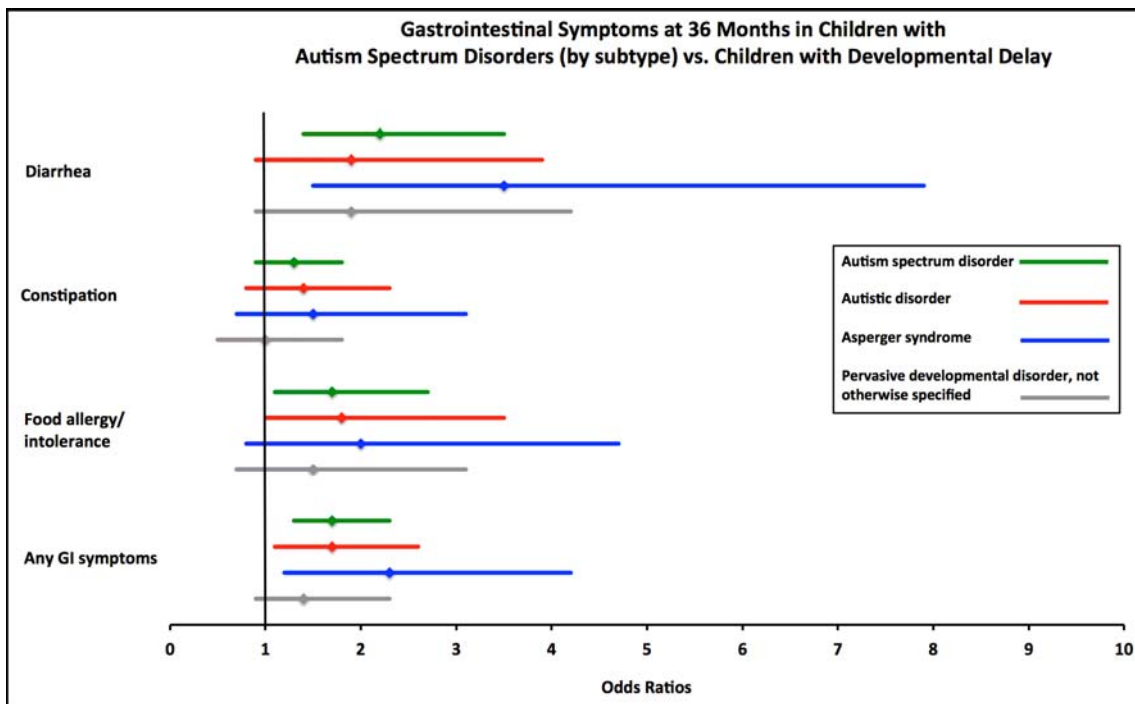

Supplement: NIHMS799098-supplement-Supplemental.pdf [file NIHMS799098-supplement-Supplemental.pdf]
